# Supplementary material for: Construction of CoP2-Mo4P3/NF Heterogeneous Interfacial Electrocatalyst for Boosting Water Splitting
Source: MDPI journal article supplement (doi:10.3390/nano13010074), 2022-12-23
Supplement: s1 [file s1]

# Construction of CoP<sub>2</sub>-Mo<sub>4</sub>P<sub>3</sub>/NF Heterogeneous Interfacial Electrocatalyst for Boosting Water Splitting

Yafeng Chen <sup>1,2</sup>, Ge Meng <sup>1</sup>, Ziwei Chang <sup>1</sup>, Ningning Dai <sup>3</sup>, Chang Chen <sup>1</sup>, Xinmei Hou <sup>2,\*</sup> and Xiangzhi Cui <sup>1,4,\*</sup>

<sup>1</sup> The State Key Laboratory of High Performance Ceramics and Superfine Microstructures, Shanghai Institute of Ceramics, Chinese Academy of Sciences, Shanghai 200050, China

<sup>2</sup> Beijing Advanced Innovation Center for Materials Genome Engineering, Collaborative Innovation Center of Steel Technology, University of Science and Technology Beijing, Beijing 100083, China

<sup>3</sup> Shanghai Motor Vehicle Inspection Certification & Tech Innovation Center Co., Ltd., Shanghai 201805, China

<sup>4</sup> School of Chemistry and Materials Science, Hangzhou Institute for Advanced Study, University of Chinese Academy of Sciences, Hangzhou 310021, China

\* Correspondence: houxinmeiustb@ustb.edu.cn (X.H.); cuixz@mail.sic.ac.cn (X.C.)

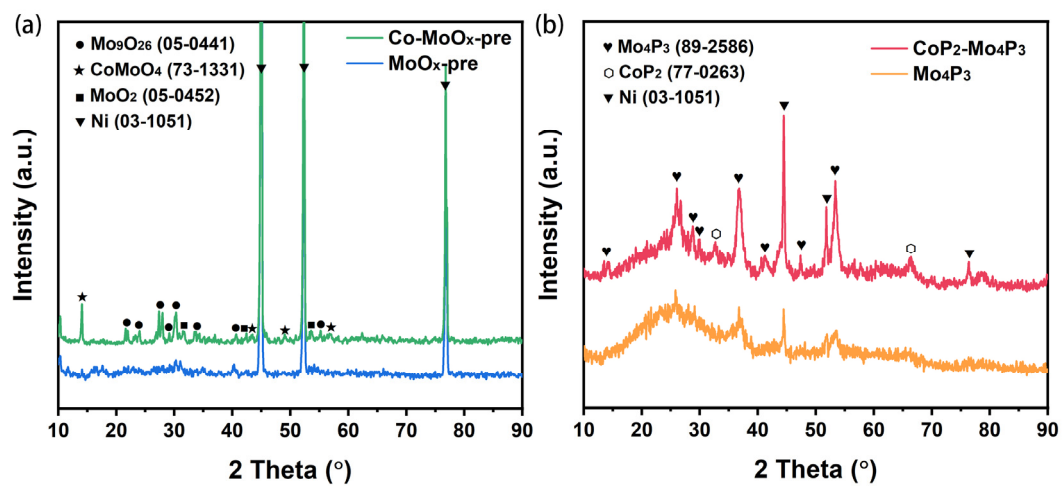

**Figure S1.** The XRD patterns of (a) Co-MoO<sub>x</sub>/NF and MoO<sub>x</sub>/NF precursors, and (b) CoP<sub>2</sub>-Mo<sub>4</sub>P<sub>3</sub>/NF and Mo<sub>4</sub>P<sub>3</sub>/NF.

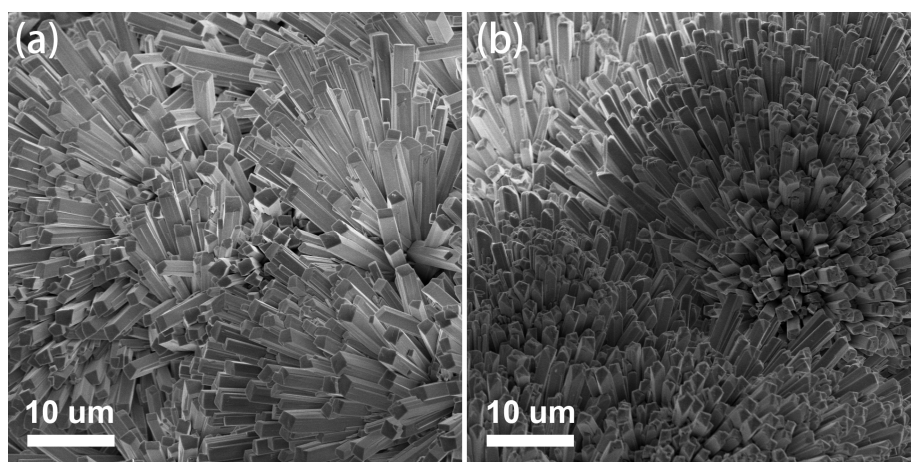

**Figure S2.** SEM images of (a)  $\text{MoO}_x/\text{NF}$  and (b)  $\text{Co-MoO}_x/\text{NF}$  precursors.

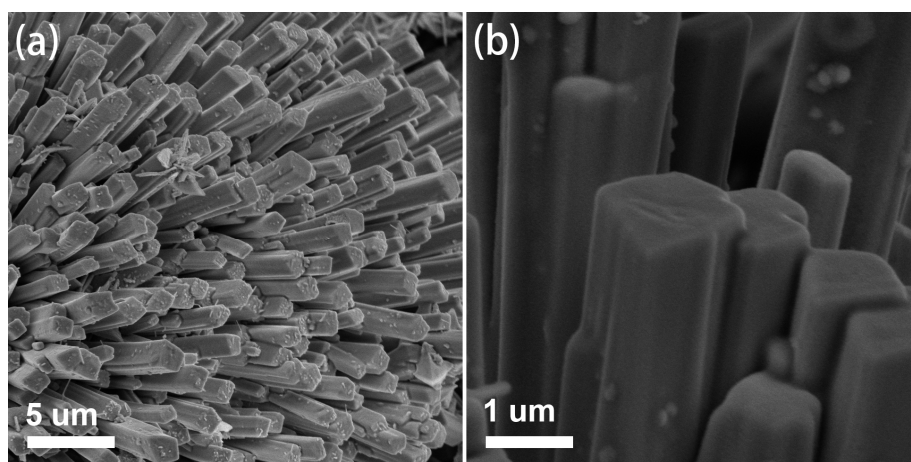

**Figure S3.** SEM images of  $\text{Mo}_4\text{P}_3/\text{NF}$  catalyst at different magnifications.

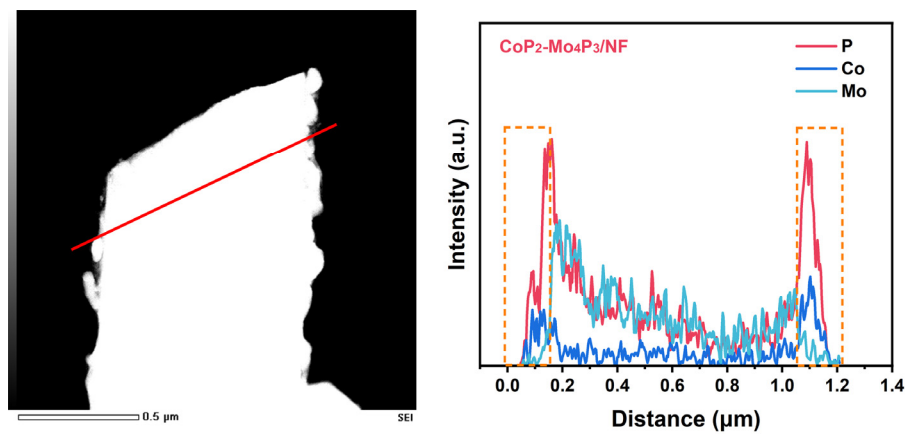

**Figure S4.** TEM-EDS line scanning image of CoP<sub>2</sub>-Mo<sub>4</sub>P<sub>3</sub>/NF (left) and the corresponding elemental spectra (right).

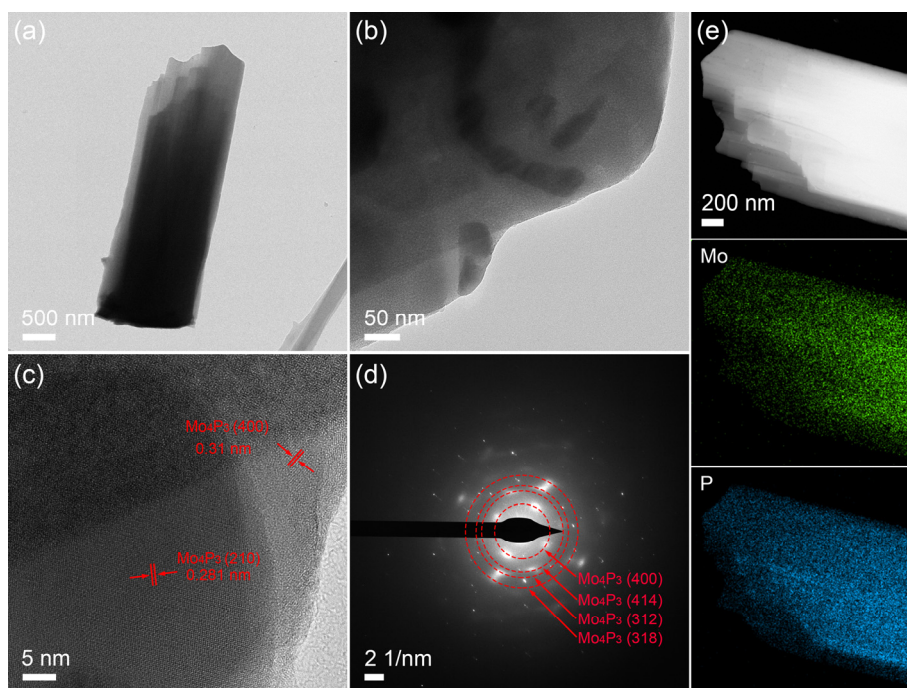

**Figure S5.** (a, b) TEM, (c) HRTEM, (d) SAED and (e) the corresponding elemental mapping images of Mo<sub>4</sub>P<sub>3</sub>/NF catalyst.

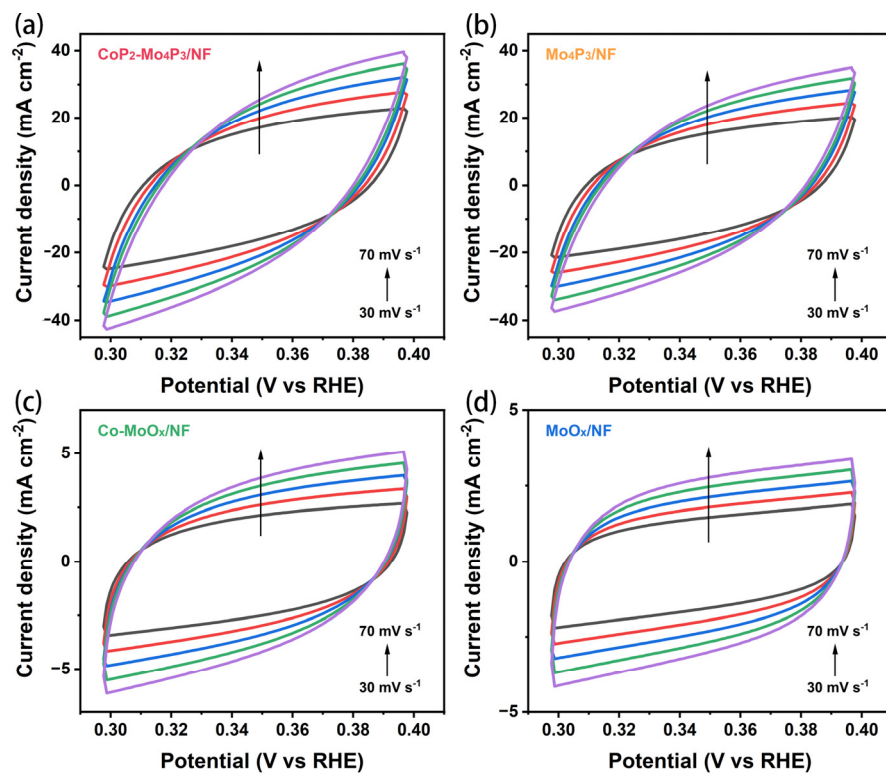

**Figure S6.** CV curves of (a) CoP<sub>2</sub>-Mo<sub>4</sub>P<sub>3</sub>/NF, (b) Mo<sub>4</sub>P<sub>3</sub>/NF, (c) Co-MoO<sub>x</sub>/NF and (d) MoO<sub>x</sub>/NF at potential regions of 0.29-0.39 V (vs. RHE) with varied scan rates of 30-70 mV s<sup>-1</sup> in 1.0 M KOH.

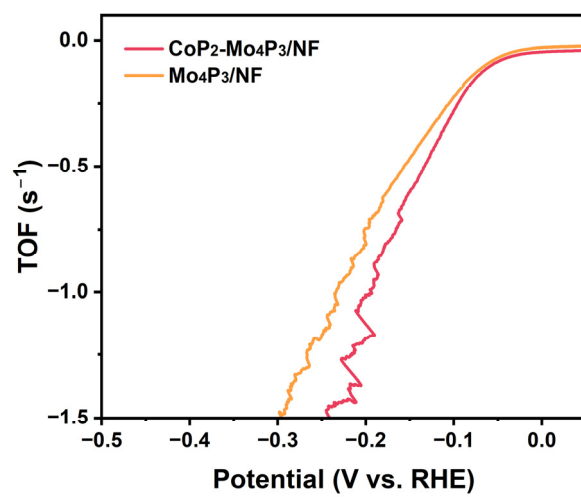

**Figure S7.** TOF curves of  $\text{CoP}_2\text{-Mo}_4\text{P}_3/\text{NF}$  and  $\text{Mo}_4\text{P}_3/\text{NF}$  catalysts.

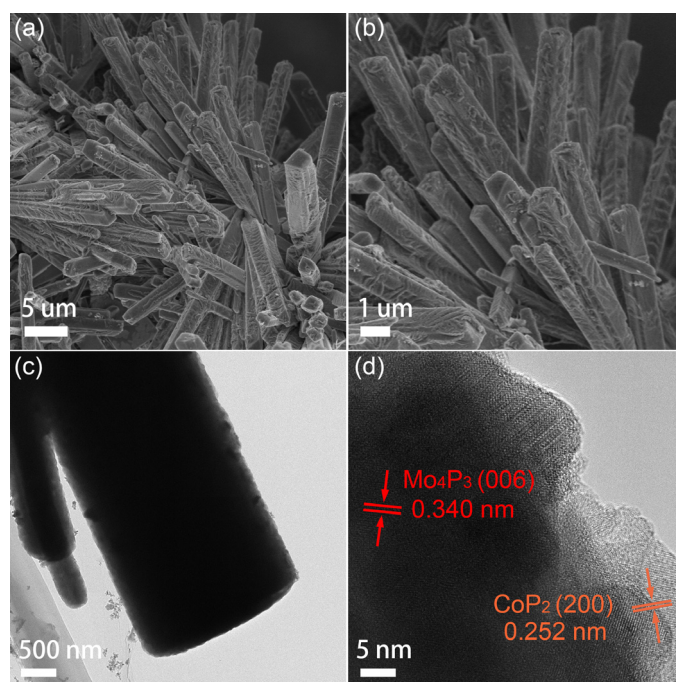

**Figure S8.** (a, b) SEM and (c, d) TEM images of  $\text{CoP}_2\text{-Mo}_4\text{P}_3/\text{NF}$  catalyst after HER stability experiment.

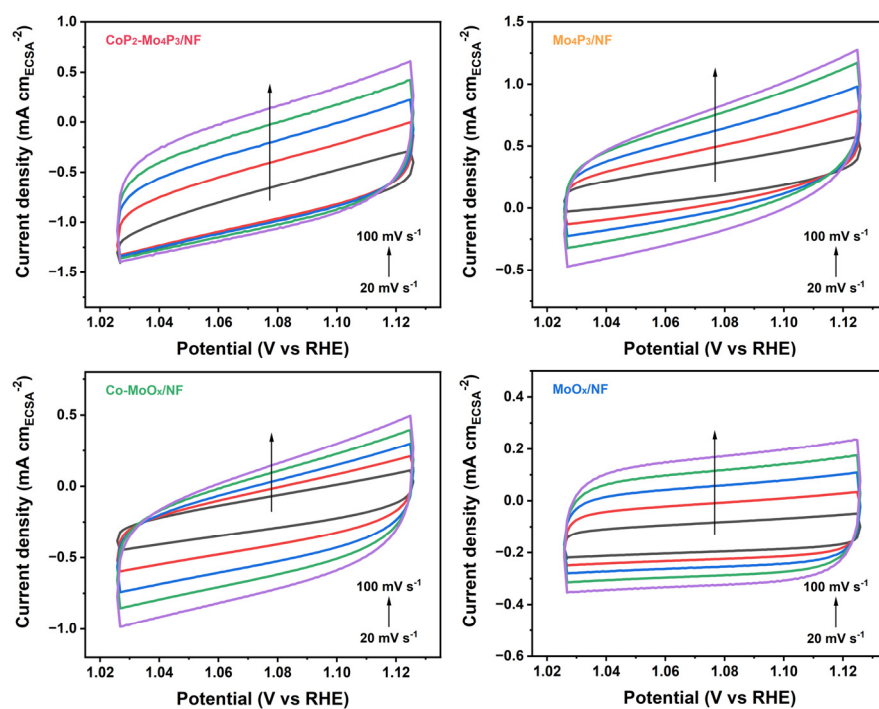

**Figure S9.** CV curves of (a) CoP<sub>2</sub>-Mo<sub>4</sub>P<sub>3</sub>/NF, (b) Mo<sub>4</sub>P<sub>3</sub>/NF, (c) Co-MoO<sub>x</sub>/NF and (d) MoO<sub>x</sub>/NF at potential regions of 1.028-1.128 V (vs. RHE) with varied scan rates of 20-100 mV s<sup>-1</sup> in 1.0 M KOH.

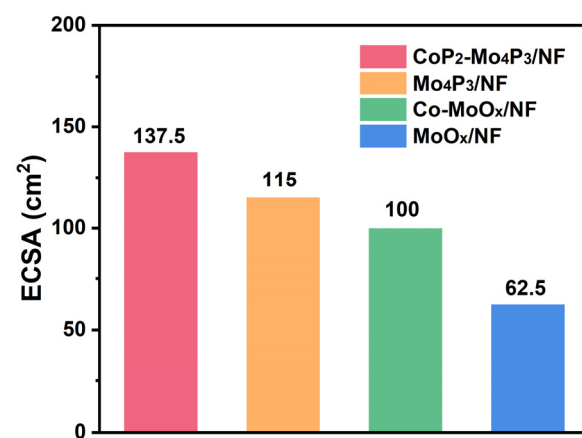

**Figure S10.** The calculated ECSA values of synthesized catalysts.

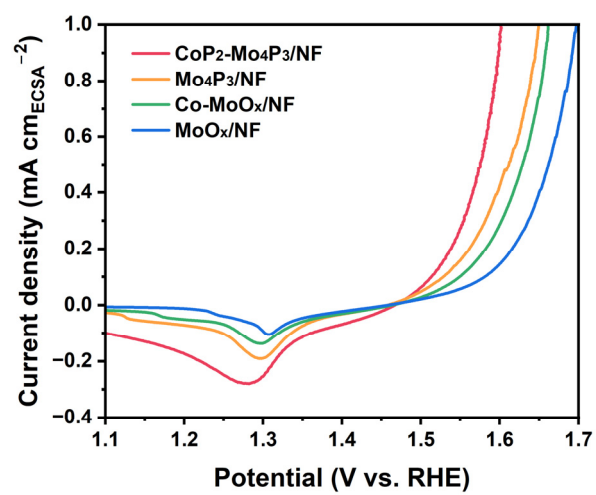

Figure S11. LSV curves normalized against ECSA.

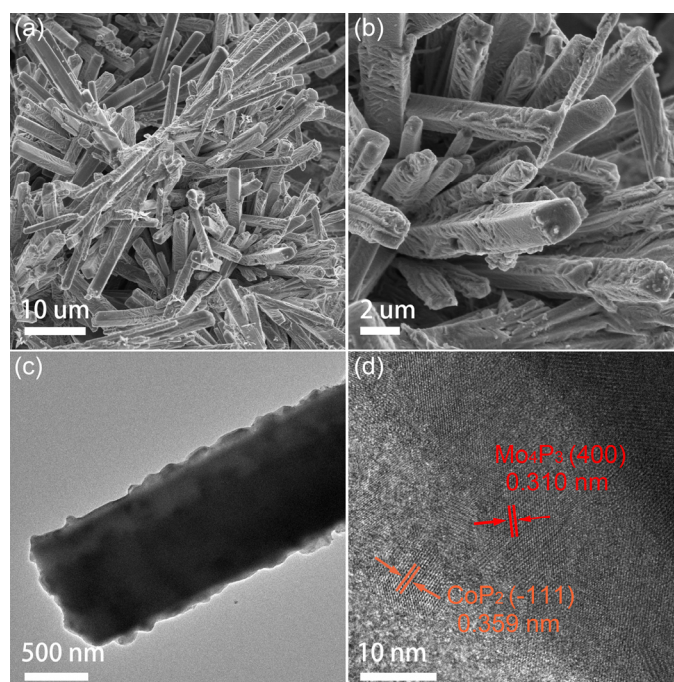

**Figure S12.** (a, b) SEM and (c, d) TEM images of  $\text{CoP}_2\text{-Mo}_4\text{P}_3/\text{NF}$  catalyst after OER stability experiment.

**Table S1.** EIS parameters of synthesized catalysts in 1.0 M KOH for HER.

| Materials                                            | $R_s(\Omega)$ | $Q_1(S \cdot s^n)$ | $n_1$ | $R_{ct1}(\Omega)$ | $Q_2(S \cdot s^n)$ | $n_2$ | $R_{ct2}(\Omega)$ |
|------------------------------------------------------|---------------|--------------------|-------|-------------------|--------------------|-------|-------------------|
| CoP <sub>2</sub> -Mo <sub>4</sub> P <sub>3</sub> /NF | 1.664         | 0.004              | 0.8   | 4.15              | 0.002              | 0.8   | 11.3              |
| Mo <sub>4</sub> P <sub>3</sub> /NF                   | 1.631         | 0.002              | 0.8   | 0.54              | 0.004              | 0.8   | 32.2              |
| Co-MoO <sub>x</sub> /NF                              | 1.674         | 0.001              | 0.9   | 5.19              | 0.001              | 0.8   | 81.6              |
| MoO <sub>x</sub> /NF                                 | 1.584         | 0.005              | 0.8   | 2.69              | 0.001              | 0.8   | 96.1              |

**Table S2.** EIS parameters of synthesized catalysts in 1.0 M KOH for OER.

| <b>Materials</b>                                      | <b><math>R_s(\Omega)</math></b> | <b><math>Q_1(S \cdot s^n)</math></b> | <b><math>n_1</math></b> | <b><math>R_{ct1}(\Omega)</math></b> | <b><math>Q_2(S \cdot s^n)</math></b> | <b><math>n_2</math></b> | <b><math>R_{ct2}(\Omega)</math></b> |
|-------------------------------------------------------|---------------------------------|--------------------------------------|-------------------------|-------------------------------------|--------------------------------------|-------------------------|-------------------------------------|
| <b>CoP<sub>2</sub>-Mo<sub>4</sub>P<sub>3</sub>/NF</b> | 1.514                           | 0.096                                | 0.9                     | 0.49                                | 0.295                                | 0.67                    | 7.57                                |
| <b>Mo<sub>4</sub>P<sub>3</sub>/NF</b>                 | 1.492                           | 0.197                                | 0.7                     | 0.42                                | 0.839                                | 0.89                    | 9.59                                |
| <b>Co-MoO<sub>x</sub>/NF</b>                          | 1.674                           | 0.200                                | 0.8                     | 0.12                                | 0.260                                | 0.80                    | 21.2                                |
| <b>MoO<sub>x</sub>/NF</b>                             | 1.741                           | 0.128                                | 0.8                     | 0.44                                | 0.161                                | 0.74                    | 44.2                                |

**Table S3.** Comparison of CoP<sub>2</sub>-Mo<sub>4</sub>P<sub>3</sub>/NF || CoP<sub>2</sub>-Mo<sub>4</sub>P<sub>3</sub>/NF with recently reported state-of-the-art OWS catalysts.

| Catalysts                                            | Electrolyte | Cell voltage<br>(V@j(mA cm <sup>-2</sup> )) | Ref       |
|------------------------------------------------------|-------------|---------------------------------------------|-----------|
| CoP <sub>2</sub> -Mo <sub>4</sub> P <sub>3</sub> /NF | 1.0 M KOH   | 1.46@10<br>1.59@100                         | This work |
| Mo-NiS/Ni(OH) <sub>2</sub>                           | 1.0 M KOH   | 1.50@10                                     | [1]       |
| P-NiMoP/NF                                           | 1.0 M KOH   | 1.52@10                                     | [2]       |
| PRN-550                                              | 1.0 M KOH   | 1.53@10                                     | [3]       |
| P-MoP/Mo <sub>2</sub> N/NF                           | 1.0 M KOH   | 1.54@10                                     | [4]       |
| MoP/Ni <sub>2</sub> P/NF                             | 1.0 M KOH   | 1.55@10                                     | [5]       |
| Co,Nb-MoS <sub>2</sub> /TiO <sub>2</sub> HSs         | 1.0 M KOH   | 1.59@10                                     | [6]       |
| MoP/NF                                               | 1.0 M KOH   | 1.62@10                                     | [7]       |
| MoP@Ni <sub>3</sub> P/NF                             | 1.0 M KOH   | 1.67@10                                     | [8]       |
| Ru <sub>1</sub> /D-NiFe LDH                          | 1.0 M KOH   | 1.54@100                                    | [9]       |
| NiMoO <sub>x</sub> /NiMoS                            | 1.0 M KOH   | 1.62@100                                    | [10]      |
| P-NiMoP/NF                                           | 1.0 M KOH   | 1.63@100                                    | [2]       |
| Ni/Mo <sub>2</sub> C-NCS                             | 1.0 M KOH   | 1.66@100                                    | [11]      |
| MoP@NiCo-LDH/NF                                      | 1.0 M KOH   | 1.7@100                                     | [12]      |
| Cr-CoP/CP                                            | 1.0 M KOH   | 1.73@100                                    | [13]      |
| MoP-Mo <sub>2</sub> C/NPC                            | 1.0 M KOH   | 1.77@100                                    | [14]      |
| FeNi LDH/V <sub>2</sub> CTx/NF                       | 1.0 M KOH   | 1.78@100                                    | [15]      |

## References

1. Zhang, H.; Xi, B.; Gu, Y.; Chen, W.; Xiong, S. Interface engineering and heterometal doping Mo-NiS/Ni(OH)<sub>2</sub> for overall water splitting. *Nano Res.* **2021**, *14*, 3466-3473.
2. Zhang, B.; Jiang, Z.; Shang, X.; Li, S.; Jiang, Z.-J. Accelerated hydrogen evolution reaction in Ni<sub>3</sub>P/MoP<sub>2</sub>/MoO<sub>2</sub> tri-phase composites with rich crystalline interfaces and oxygen vacancies achieved by plasma assisted phosphorization. *J. Mater. Chem. A* **2021**, *9*, 25934-25943.
3. Kim, M.; Park, J.; Ju, H.; Kim, J. Y.; Cho, H.-S.; Kim, C.-H.; Kim, B.-H.; Lee, S. W. Understanding synergistic metal-oxide interactions of in situ exsolved metal nanoparticles on a pyrochlore oxide support for enhanced water splitting. *Energy Environ. Sci.* **2021**, *14*, 3053-3063.
4. Gu, Y.; Wu, A.; Jiao, Y.; Zheng, H.; Wang, X.; Xie, Y.; Wang, L.; Tian, C.; Fu, H. Two-Dimensional Porous Molybdenum Phosphide/Nitride Heterojunction Nanosheets for pH-Universal Hydrogen Evolution Reaction. *Angew Chem Int Ed Engl* **2021**, *60*, 6673-6681.
5. Du, C.; Shang, M.; Mao, J.; Song, W. Hierarchical MoP/Ni<sub>3</sub>P heterostructures on nickel foam for efficient water splitting. *J. Mater. Chem. A* **2017**, *5*, 15940-15949.
6. Nguyen, D. C.; Luyen Doan, T. L.; Prabhakaran, S.; Tran, D. T.; Kim, D. H.; Lee, J. H.; Kim, N. H. Hierarchical Co and Nb dual-doped MoS<sub>2</sub> nanosheets shelled micro-TiO<sub>2</sub> hollow spheres as effective multifunctional electrocatalysts for HER, OER, and ORR. *Nano Energy* **2021**, *82*, 105750.
7. Jiang, Y.; Lu, Y.; Lin, J.; Wang, X.; Shen, Z. A Hierarchical MoP Nanoflake Array Supported on Ni Foam: A Bifunctional Electrocatalyst for Overall Water Splitting. *Small Methods* **2018**, *2*, 1700369.
8. Wang, F.; Chen, J.; Qi, X.; Yang, H.; Jiang, H.; Deng, Y.; Liang, T. Increased nucleation sites in nickel foam for the synthesis of MoP@Ni<sub>3</sub>P/NF nanosheets for bifunctional water splitting. *Appl. Surf. Sci.* **2019**, *481*, 1403-1411.
9. Zhai, P.; Xia, M.; Wu, Y.; Zhang, G.; Gao, J.; Zhang, B.; Cao, S.; Zhang, Y.; Li, Z.; Fan, Z.; Wang, C.; Zhang, X.; Miller, J. T.; Sun, L.; Hou, J. Engineering single-atomic ruthenium catalytic sites on defective nickel-iron layered double hydroxide for overall water splitting. *Nat. Commun.* **2021**, *12*, 4587.
10. Zhai, P.; Zhang, Y.; Wu, Y.; Gao, J.; Zhang, B.; Cao, S.; Zhang, Y.; Li, Z.; Sun, L.; Hou, J. Engineering active sites on hierarchical transition bimetal oxides/sulfides heterostructure array enabling robust overall water splitting. *Nat. Commun.* **2020**, *11*, 5462.
11. Xu, Y.; Yang, J.; Liao, T.; Ge, R.; Liu, Y.; Zhang, J.; Li, Y.; Zhu, M.; Li, S.; Li, W. Bifunctional water splitting enhancement by manipulating Mo-H bonding energy of transition Metal-Mo<sub>2</sub>C heterostructure catalysts. *Chem. Eng. J.* **2022**, *431*, 134126.

12. Wang, T.; Wu, H.; Feng, C.; Zhang, L.; Zhang, J. MoP@NiCo-LDH on nickel foam as bifunctional electrocatalyst for high efficiency water and urea–water electrolysis. *J. Mater. Chem. A* **2020**, *8*, 18106–18116.
13. Li, W.; Jiang, Y.; Li, Y.; Gao, Q.; Shen, W.; Jiang, Y.; He, R.; Li, M. Electronic modulation of CoP nanoarrays by Cr-doping for efficient overall water splitting. *Chem. Eng. J.* **2021**, *425*, 130651.
14. Jiang, E.; Li, J.; Li, X.; Ali, A.; Wang, G.; Ma, S.; Kang Shen, P.; Zhu, J. MoP-Mo<sub>2</sub>C quantum dot heterostructures uniformly hosted on a heteroatom-doped 3D porous carbon sheet network as an efficient bifunctional electrocatalyst for overall water splitting. *Chem. Eng. J.* **2022**, *431*, 133719.
15. Yang, L.; Yang, T.; Chen, Y.; Zheng, Y.; Wang, E.; Du, Z.; Chou, K. C.; Hou, X. FeNi LDH/V<sub>2</sub>CTx/NF as Self-Supported Bifunctional Electrocatalyst for Highly Effective Overall Water Splitting. *Nanomaterials (Basel)* **2022**, *12*, 2640.
